# Supplementary material
Source: HighWire-hosted journal article supplement (https://bmjopen.bmj.com/content/6/9/e011238)
Supplement: inline-supplementary-material-2 [file inline-supplementary-material-2.pdf]

Full search strategy for PubMed

((((((((((((Randomized controlled trial) OR Cluster randomized controlled trial) AND Nutritional intervention) OR nutrition intervention) AND Natural disaster) OR natural disasters) AND under five) OR under 5) OR under-5) AND acute malnutrition) OR stunting) OR wasting) OR underweight) OR anemia
